# Supplementary material for: High SARS-CoV-2 Seroprevalence and Rapid Neutralizing Antibody Decline among Agricultural Workers in Rural Guatemala, June 2020–March 2021
Source: MDPI journal article supplement (doi:10.3390/vaccines10071160), 2022-07-21
Supplement: s1 [file s1]

**Supplemental Figure S1.** Lentivirus-based assay (A) and neutralizing antibody inhibition curves (B and C) utilized to evaluate the magnitude and stability of SARS-CoV-2 neutralizing antibody response

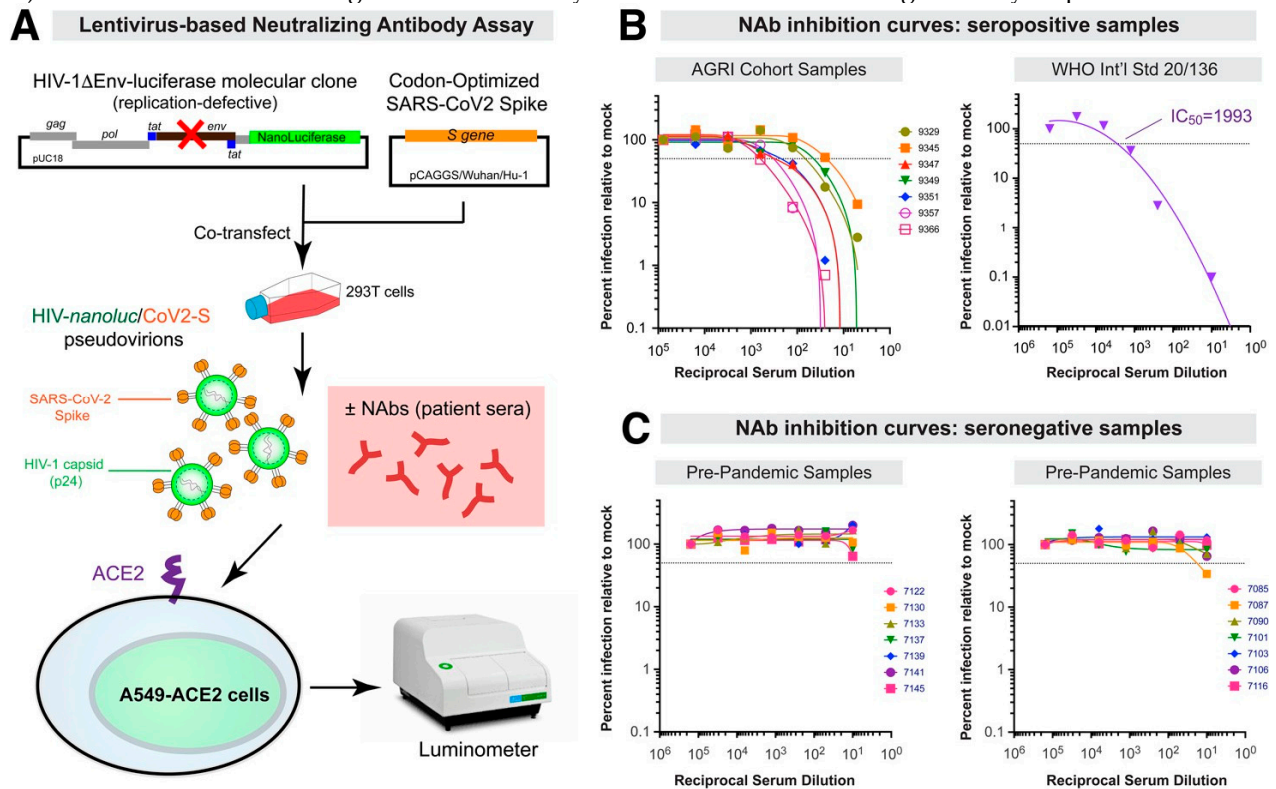

(A) the generation of HIV-1/nanoluciferase particles pseudotyped with the Spike gene of the Wuhan/Hu-1 strain. Pseudotype entry was assessed in A549-ACE2 cells. Typical neutralization curves for (B) seropositive AGRI cohort specimens and (C) an international serum standard. Dotted lines mark the serum concentration that results in 50% inhibition relative to mock.
