# Supplementary material for: High SARS-CoV-2 Seroprevalence and Rapid Neutralizing Antibody Decline among Agricultural Workers in Rural Guatemala, June 2020–March 2021
Source: MDPI journal article supplement (doi:10.3390/vaccines10071160), 2022-07-21
Supplement: s1 [file s1]

**Supplemental Table S1.** Neutralizing antibody decay associated with sex, age, and comorbid health conditions

|                                    | All participants with decreasing NAb titers (N = 65) |         | Decreasing NAb titers with outliers removed (N = 62)* |         | Participants with decreasing anti-nucleocapsid IgG COIs (N = 47) |         |
|------------------------------------|------------------------------------------------------|---------|-------------------------------------------------------|---------|------------------------------------------------------------------|---------|
|                                    | Slope of Ab decay                                    | P-value | Slope of Ab decay                                     | P-value | Slope of decrease                                                | P-value |
| <b>Age at enrollment</b>           | 0.009                                                | 0.15    | -0.0007                                               | 0.47    | -0.009                                                           | 0.42    |
| <b>Sex (female)</b>                | -0.12                                                | 0.63    | -0.03                                                 | 0.37    | -0.12                                                            | 0.58    |
| <b>Presence of comorbidities**</b> | -0.11                                                | 0.57    | -0.02                                                 | 0.46    | -0.19                                                            | 0.49    |

NAb=neutralizing antibodies, COI=cut off index

\*A subset (n=12) of the 77 participants with sera available for NAb testing at two timepoints were excluded due to NAb increases between the first and second collection dates.

\*\*Comorbidities means reporting having at least one of the following conditions at enrollment: BMI > 30 kg/m<sup>2</sup>, pulmonary disease, neurologic disease, liver disease, kidney disease, cardiovascular disease, diabetes, asthma, blood disorder; ~14% of workers in the sub-analysis had at least 1 comorbidity.
