# Supplementary material for: High SARS-CoV-2 Seroprevalence and Rapid Neutralizing Antibody Decline among Agricultural Workers in Rural Guatemala, June 2020–March 2021
Source: MDPI journal article supplement (doi:10.3390/vaccines10071160), 2022-07-21
Supplement: s1 [file s1]

**Supplemental Figure S3.** Percentage of participants seropositive at enrollment by worksite and job type

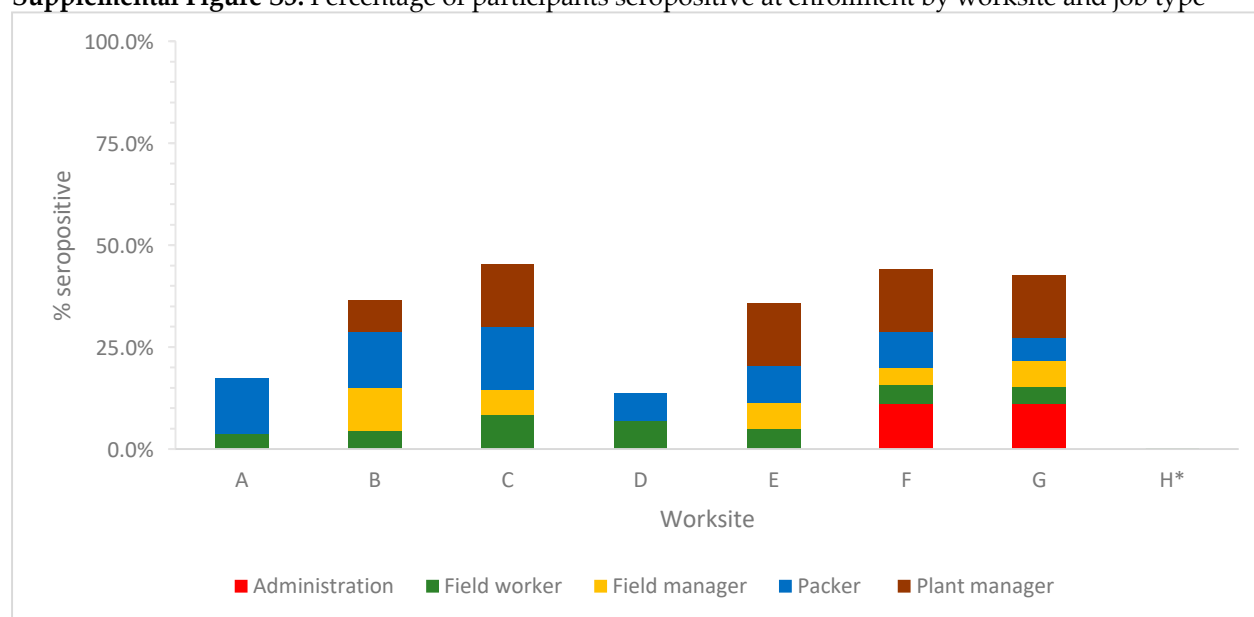

Worksite "I" is omitted as no participants reporting to this site were seropositive for SARS-CoV-2 at enrollment

\*One field worker of n=3 participants reporting to worksite "H" was seropositive at enrollment
