# Supplementary material for: High SARS-CoV-2 Seroprevalence and Rapid Neutralizing Antibody Decline among Agricultural Workers in Rural Guatemala, June 2020–March 2021
Source: MDPI journal article supplement (doi:10.3390/vaccines10071160), 2022-07-21
Supplement: s1 [file s1]

**Supplemental Figure S2.** Participant anti-SARS-CoV-2 nucleocapsid IgG serostatus at enrollment and total number of participants with a subsequent SARS-CoV-2 infection by enrollment month

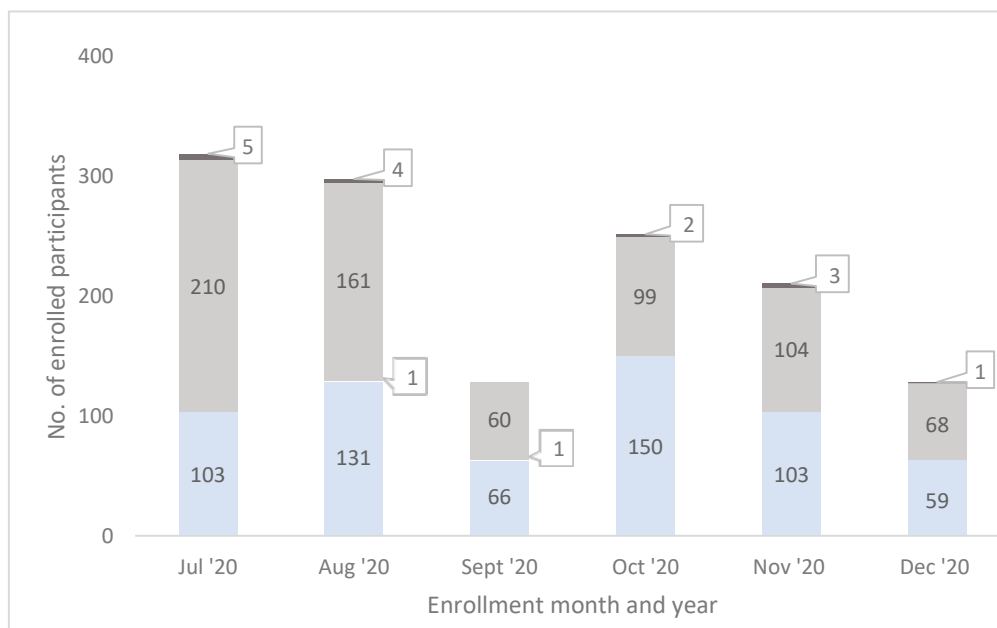

Light grey: SARS-CoV-2 seronegative participants at enrollment, dark grey: SARS-CoV-2 seronegative participants at enrollment with a subsequent SARS-CoV-2 infection during the follow-up period, light blue: SARS-CoV-2 seropositive participants at enrollment, dark blue: SARS-CoV-2 seropositive participants at enrollment with a subsequent SARS-CoV-2 infection during follow-up
