# Supplementary material for: High SARS-CoV-2 Seroprevalence and Rapid Neutralizing Antibody Decline among Agricultural Workers in Rural Guatemala, June 2020–March 2021
Source: Vaccines (Basel). 2022 Jul 21;10(7):1160. doi: 10.3390/vaccines10071160 (PMC9323551; doi:10.3390/vaccines10071160)
Supplement: Supplementary file 1 [file vaccines-10-01160-s001.zip]

Archive with 4 entries (4 files):
- Figure S1_revised_order_only.pdf
- Figure S2_revised_order_only.pdf
- Figure S3_revised.pdf
- Table S1_revised.pdf
